# Supplementary material for: Mild-heat-inducible sequentially released liposomal complex remodels the tumor microenvironment and reinforces anti-breast-cancer therapy
Source: Royal Society of Chemistry journal article supplement (doi:10.1039/d0bm00498g), 2020-01-01
Supplement: d0bm00498g1.pdf [file d0bm00498g1.pdf]

## Supplemental information

### **A mild heat-inducible sequentially-released liposomal complex remodels tumor microenvironment and reinforces anti-breast cancer therapy**

Yue Qin<sup>a,b,c,1</sup>, Tingting Liu<sup>a,1</sup>, Mengfei Guo<sup>a</sup>, Yuping Liu<sup>a,b</sup>, Congyan Liu<sup>a,b</sup>,

Yan Chen<sup>\*a,b</sup> and Ding Qu<sup>\*a,b</sup>

<sup>a</sup>Affiliated Hospital of Integrated Traditional Chinese and Western Medicine, Nanjing  
University of Chinese Medicine, Nanjing 210028, China

<sup>b</sup>Jiangsu Provincial Academy of Traditional Chinese Medicine, Nanjing 210028, China.

<sup>c</sup>Cancer Hospital, Chinese Academy of Sciences, Hefei, 230031, China

E-mail: ychen202@hotmail.com (Y. Chen); quding1985@hotmail.com (D. Qu)

Table S1. IC50 of various formulations against MCF-7 cells for 24 h (n = 6)

| Formulation | IC50 ( $\mu\text{M}$ ) |
|-------------|------------------------|
| Celastrol   | $3.27 \pm 0.29$        |
| C+T         | $3.21 \pm 0.16$        |
| G-T/C-L     | $3.44 \pm 0.11$        |
| G-T/C-L+NIR | $1.62 \pm 0.12$        |
